# Supplementary material
Source: Research Square preprint supplement (doi:10.21203/rs.3.rs-9497790/v1)
Supplement: Supplementary file 2 [file cec95f1f778a37187d2308b6.docx]

**Table S1.** Baseline demographic and clinical characteristics of total cohort, 7-day survivors, and 7-day non-survivors.

| **Variables** | **Overall**  **(n = 499)** | **7-days survivor**  **(n = 476)** | **7-days non-survivor**  **(n = 23)** | ***P*** value |
| --- | --- | --- | --- | --- |
| **Demographics** |  |  |  |  |
| **Sex** |  |  |  | 0.343 |
| Female | 151 (30.3) | 142 (29.8) | 9 (39.1) |  |
| Male | 348 (69.7) | 334 (70.2) | 14 (60.9) |  |
| Age, (years) | 66.3 ± 13.0 | 66.0 ± 13.1 | 71.6 ± 10.3 | 0.045 |
| **Vital signs** |  |  |  |  |
| Heart rate  (HR, bpm) | 82.2 ± 19.7 | 81.5 ± 18.7 | 97.8 ± 31.1 | < 0.001 |
| RR, (bpm) | 19.6 ± 3.7 | 19.4 ± 3.2 | 23.8 ± 8.3 | < 0.001 |
| **Laboratory tests** |  |  |  |  |
| Red blood cell  (RBC, M/mcL) | 4.4 ± 1.1 | 4.4 ± 1.0 | 4.6 ± 2.2 | 0.362 |
| HGB, (g/dL) | 13.0 ± 2.2 | 13.1 ± 2.1 | 12.5 ± 3.2 | 0.233 |
| Platelet  (1000K/mcl) | 211.3 ± 60.0 | 211.9 ± 59.0 | 199.6 ± 79.5 | 0.336 |
| Mean platelet volume  (fL) | 10.9 ± 1.1 | 10.9 ± 1.1 | 11.3 ± 1.2 | 0.084 |
| WBC, (1000K/mcl) | 8.9 ± 2.9 | 8.7 ± 2.6 | 12.1 ± 5.3 | < 0.001 |
| Lymphocyte percentage  (pct, %) | 1.5 ± 0.9 | 1.4 ± 0.7 | 2.8 ± 2.4 | < 0.001 |
| Neutrophil percentage  (pct, %) | 6.7 ± 2.5 | 6.6 ± 2.3 | 8.6 ± 3.7 | < 0.001 |
| Monocyte percentage (pct, %) | 0.6 ± 0.3 | 0.6 ± 0.3 | 0.7 ± 0.4 | 0.019 |
| Alanine aminotransferase  (ALT, Units/L) | 25.0 (16.0, 38.0) | 25.0 (16.0, 37.0) | 48.0 (18.0, 90.5) | 0.016 |
| Aspartate aminotransferase (AST, Units/L) | 36.0 (22.0, 74.5) | 35.0 (22.0, 72.0) | 69.0 (22.0, 332.0) | 0.044 |
| Albumin (ALB, g/dL) | 40.0 ± 4.3 | 40.1 ± 4.1 | 35.9 ± 4.9 | < 0.001 |
| Creatinine  (Cr, mg/dL) | 0.9 (0.7, 1.2) | 0.9 (0.7, 1.1) | 1.4 (1.1, 1.9) | < 0.001 |
| Activated partial thromboplastin time  (APTT, sec) | 32.0 (27.2, 70.8) | 31.8 (27.2, 68.6) | 37.6 (28.2, 89.3) | 0.578 |
| Creatine kinase-MB  (CKMB, Units/L) | 7.6 (2.3, 35.8) | 7.6 (2.2, 35.8) | 5.5 (3.2, 32.7) | 0.89 |
| **Comorbidities** |  |  |  |  |
| Diabetes |  |  |  | 0.04 |
| No | 355 (71.1) | 343 (72.1) | 12 (52.2) |  |
| Yes | 144 (28.9) | 133 (27.9) | 11 (47.8) |  |
| **Composite indicators** |  |  |  |  |
| MPV/NC | 1.9 ± 0.9 | 1.9 ± 0.9 | 1.5 ± 0.6 | 0.038 |
